# Supplementary material
Source: HighWire-hosted journal article supplement (https://qualitysafety.bmj.com/content/27/5/340)
Supplement: inline-supplementary-material-1 [file inline-supplementary-material-1.docx]

**Online Supplement eTable: Case Definitions for Low-Value Services Measured in this Study**

| Low Value Service: | Eligible Population | Sources of Data | Administrative Claims Case Definition |
| --- | --- | --- | --- |
| PSA Testing for men 75 or older with no prior history of Prostate cancer | All male patients 75 or older with no prior history of Prostate cancer (N=100,227) | NACRS, DAD, Claims, Lab | ICD 10: Z125, C61 in DAD and NACRS  ICD 9: V76.4 in Claims  Lab testing name: "%Free PSA", "PSA RATIO", "PSA Comment", "PSA free",  "Prostate Specific Antigen", "Prostate Specific Antigen Free" |
| Cancer screening in dialysis patients 75 years or older | All patients on dialysis 75 years or older (N=1,073) | NACRS, DAD, Claims, Lab | ICD 10: Z49.*, Z121, Z123, Z124, Z125 in DAD and NACRS  ICD 9: V76.1, V76.2, V76.4, V76.5, 01.24B, 01.22, procedure 13.99BC, 13.99BA, X27 in Claims  Lab testing name: "%Free PSA", "PSA RATIO", "PSA Comment", "PSA free",  "Prostate Specific Antigen", "Prostate Specific Antigen Free" |
| Cervical Cancer screening for women over 65 with no prior history of cervical dysplasia or genital cancer | All female patients over 65 with no prior history of cervical cancer or dysplasia or no female genital cancer (N=279,116) | NACRS, DAD, Claims | ICD 10: C539, N87, C51-C58,Z124 in DAD and NACRS  ICD 9: V76.2, procedure 13.99BC, 13.99BA in Claims |
| Bone mineral Density Testing within 2 years of prior scan | All patients with Bone mineral Density Testing  (N=271,584) | NACRS, DAD, Claims | ICD 10: Z13.820 in DAD and NACRS  procedure X128 in Claims |
| Hypercoaguability testing in patients with first DVT/PE | All patients with first DVT/PE (N=21,311) | NACRS, DAD, Lab | ICD 10: I82, I26 in DAD and NACRS  Lab testing name: "Protein C", "Protein S", "Factor V", "Factor V Activity" |
| Preoperative coronary CT scan or cardiac stress tests | All patients undergoing non-cardiac surgery (N=698,683) | NACRS, DAD, Claims | CCI code: 3IP20, 2HZ08, 3IP70, 1KA80LA,1KA80LA, 1KA76MZ,1NF87DG,1NF82RJ,1NF87DH,1NF87DJ  1NF87DL,1NF87DQ,1NF87LA,1NF87RG,1NF87RH  1NF87RJ,1NF87RK,1NF87RP,1NF87SH,1NF89DZ  1NF89GW,1NF89SG,1NF89TH,1NF91RG,1NF91RJ  1NF91RP,1NF91SG,1NK87DA,1NK87DN,1NK87DP  1NK87DX,1NK87DY,1NK87LA,1NK87RE,1NK87RF  1NK87TF,1NK87TG,1NM87,1MN89,1NM91,1NP72  1NV89,1OB87,1OB89,1OJ87,1OK89,1GR87,1GR89  1GR91,1GT87,1GR89,1GT89,1GT91,1QT91,1RB57  1RB87,1RB89,1RD89,1RM89,1RM91,1JE57LA, 1KY76LA,1KG76MI,1PC87,1PC89,1PC91,1PM87  1PM89,1PM91, 1SC80PF, 1SE89PF, 1SC75PFNWA  1VQ93LA,1VC93LA,1WJ93LA,1VC74,1VG53,1VA53  1VA74,1WA74LANW,1WA73LA,1WA80,1NA56BA  1NE50BA,1NF13BA,1NF56BA,1NM50BA,1NM56BA  1NQ56BA,2NA70BA,2NA71BP,2NA71BR,2NC70BA  2NF70BA,2NF71BA,2NK70BA,2NK71BA,2NK71BR  2NM70BA,2NM71BA,2NM71BR,2NQ70BA,2NQ71BA  1PE56BA,1PL72BA,1PM56BA,1PM87BA,1PQ50BA  1PQ56BA,1QT87BA,2PG70DA,2PG71BA,2PG71DA  2PG71BR,2PM70BA,2PM71BA,2PM71DA,2PQ70BA  2PQ71BA,2QT70BA,2QT71BA,1CL89VRLM, 1YA - 1YZ  Claim procedure code: 38.4, 39.25, 43.5,43.6,43.7, 43.8, 43.9, 45.6, 45.7, 45.8, 54.5, 47.0,41.2,41.4,41.5  52.5,52.6,52.7, 32.3,32.4,32.5,60.3,60.4,60.5,60.61, 65.2,65.3,65.5,65.6,68.0,68.3,68.4,68.5,68.6,68.7,38.1  39.29, 39.27, 55.4,55.5,03.53,80.5, 81.03,81.05,81.08  84.15, 84.17, 84.12, 79.35, 81.54,81.55, 81.51,81.52  81.53, 79.37, 42.23,42.24,44.13,44.14,44.22,44.40-44.43,45.13,45.14,45.23,45.25,45.24,46.85,48.23,48.24  98.02,98.03,98.04,98.05,56,56.31,56.33,57,57.32,57.33  57.4,57.91-57.92,58.21,58.23,58.6,60.11,60.29,98.19,  13.1-13.7, 85.20-85.23,85.41-85.44,85.45-85.46,85.47-85.48 |
| Colorectal Cancer screening for older elderly patients | All patients over 75 | NACRS, DAD, Claims | ICD 10: Z121 in DAD and NACRS  ICD 9: V76.5, 01.24B, 01.22 in Claims |
| age>75 | (N=218,882) |  |  |
| age>85 | (N=45,577) |  |  |
| Homocysteine testing for CVD | All patients without measurement of B12/folate or history of B12/folate deficiency  (N=2,601,842) | Lab | Lab testing name: ("Homocys Total", "Homocyst Tot", "Homocysteine", "Homocystine" |
| Carotid Artery Imaging but without history of stroke or TIA | All adult patients without history of stroke or TIA  (N=3,162,394) | NACRS, DAD, Claims | CCI code: 3JE30 in DAD and NACRS  ICD 10: I63, I65, I66, I67, H349, G453 in DAD and NACRS  ICD 9: 362.3, 433, 434, 435 in Claims |
| Carotid Artery Imaging for patients with syncope | All patients with syncope in an ER/hospital/outpatient clinic  (N=74,060) | NACRS, DAD, Claims | CCI code: 3JE30 in DAD and NACRS  ICD 10: R55 in DAD and NACRS  ICD 9: 780.2 in Claims |

NACRS = National Ambulatory Care Reporting System, DAD = discharge abstract database
